# Supplementary material
Source: PubMed Central journal article supplement (PMC7593878)
Supplement: jamacardiol-e204939-s001.pdf [file jamacardiol-e204939-s001.pdf]

## Supplemental Online Content

Ajufo E, Ayers CR, Vigen R, et al. Value of coronary artery calcium scanning in association with the net benefit of aspirin in primary prevention of atherosclerotic cardiovascular disease. *JAMA Cardiol*. Published online October 28, 2020. doi:10.1001/jamacardio.2020.4939

**eFigure 1.** Participant selection

**eFigure 2.** Estimated increase in bleeding event rate vs reduction in ASCVD event rate with aspirin use for primary prevention in DHS participants stratified by ASCVD risk and CAC (including CAC >300 category)

**eFigure 3.** Estimated increase in bleeding event rate vs reduction in ASCVD event rate with aspirin use for primary prevention in DHS participants without interval aspirin uptake

**eFigure 4.** Estimated increase in 5-year bleeding event rate vs reduction in adjudicated 5-year ASCVD event rate with aspirin use for primary prevention stratified by CAC

**eFigure 5.** Estimated increase in bleeding event rate vs reduction in ASCVD event rate with aspirin use for primary prevention in DHS participants stratified by ASCVD risk and CAC (aspirin effect estimate taken from contemporary aspirin trials)

**eFigure 6.** Estimated increase in bleeding event rate vs reduction in ASCVD event rate with aspirin use for primary prevention in DHS participants at lower bleeding risk stratified by ASCVD risk and CAC (aspirin effect estimate taken from contemporary aspirin trials)

**eFigure 7.** Estimated increase in bleeding event rate vs reduction in ASCVD event rate with aspirin use for primary prevention in DHS participants stratified by age, ASCVD risk and CAC

**eTable 1.** ICD codes used to identify bleeding events from the DFWHC and NDI databases

**eTable 2.** Bleeding event categories

**eTable 3.** ASCVD event rate and hazard ratios stratified by CAC

**eTable 4.** Bleeding event rate and hazard ratios stratified by CAC in DHS participants without interval aspirin uptake

**eTable 5.** ASCVD and bleeding event rates in various subgroups

This supplemental material has been provided by the authors to give readers additional information about their work.

**eFigure 1.** Participant selection

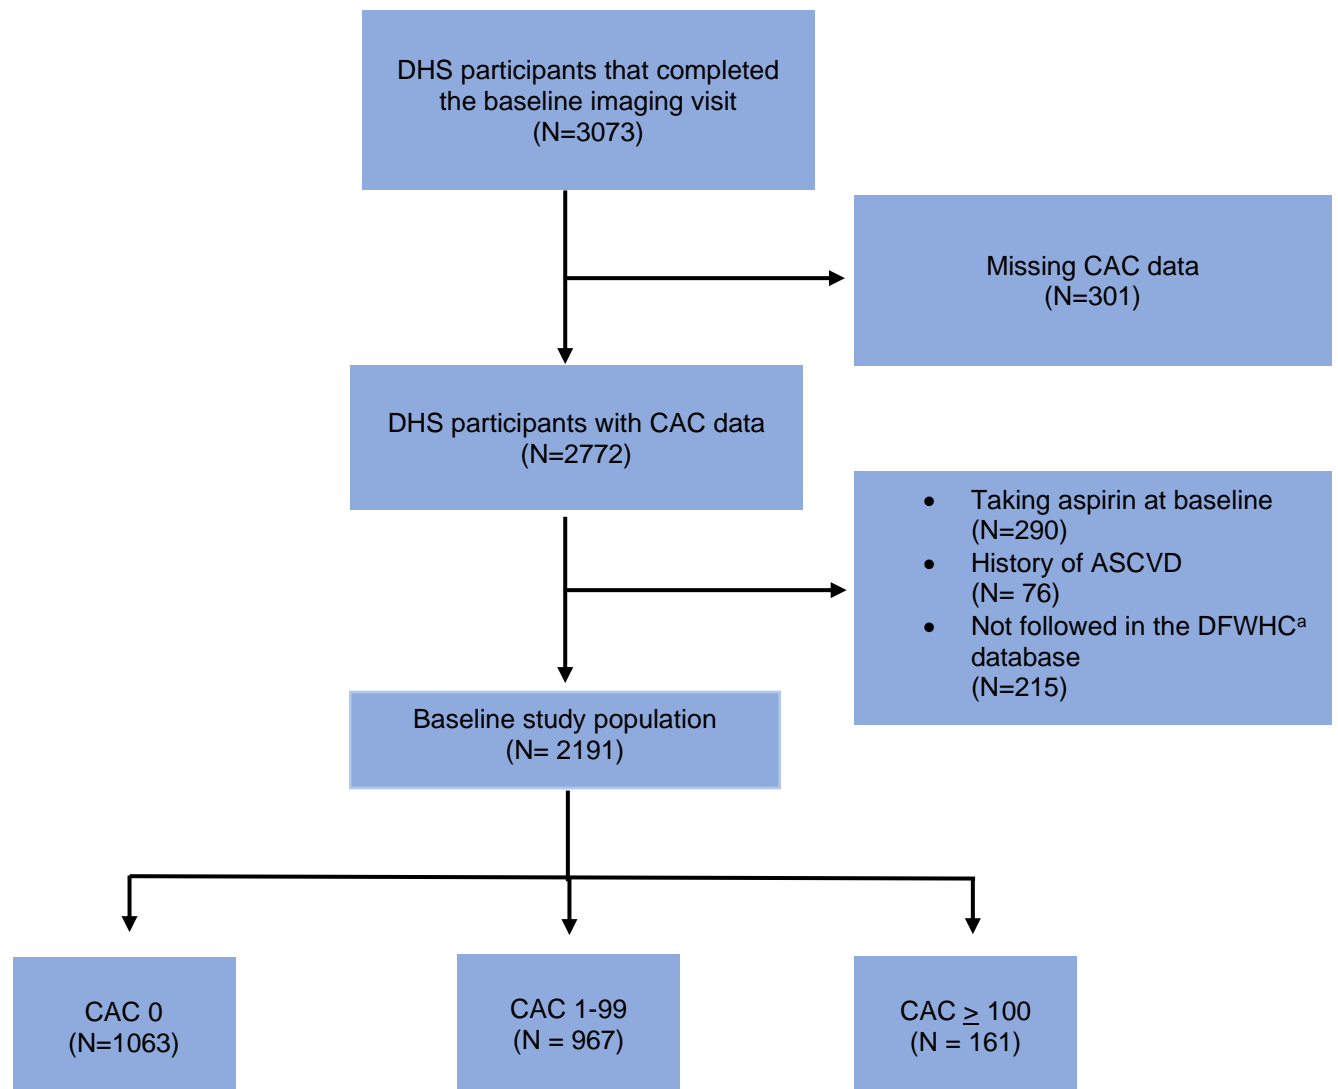

<sup>a</sup> ASCVD, Atherosclerotic cardiovascular disease; CAC, coronary artery calcium; DHS, Dallas Heart Study; DFWHC, Dallas Fort Worth Hospital coalition database

**eFigure 2.** Estimated increase in bleeding event rate vs reduction in ASCVD event rate with aspirin use for primary prevention in DHS participants stratified by ASCVD risk and CAC (including CAC  $\geq 300$  category)

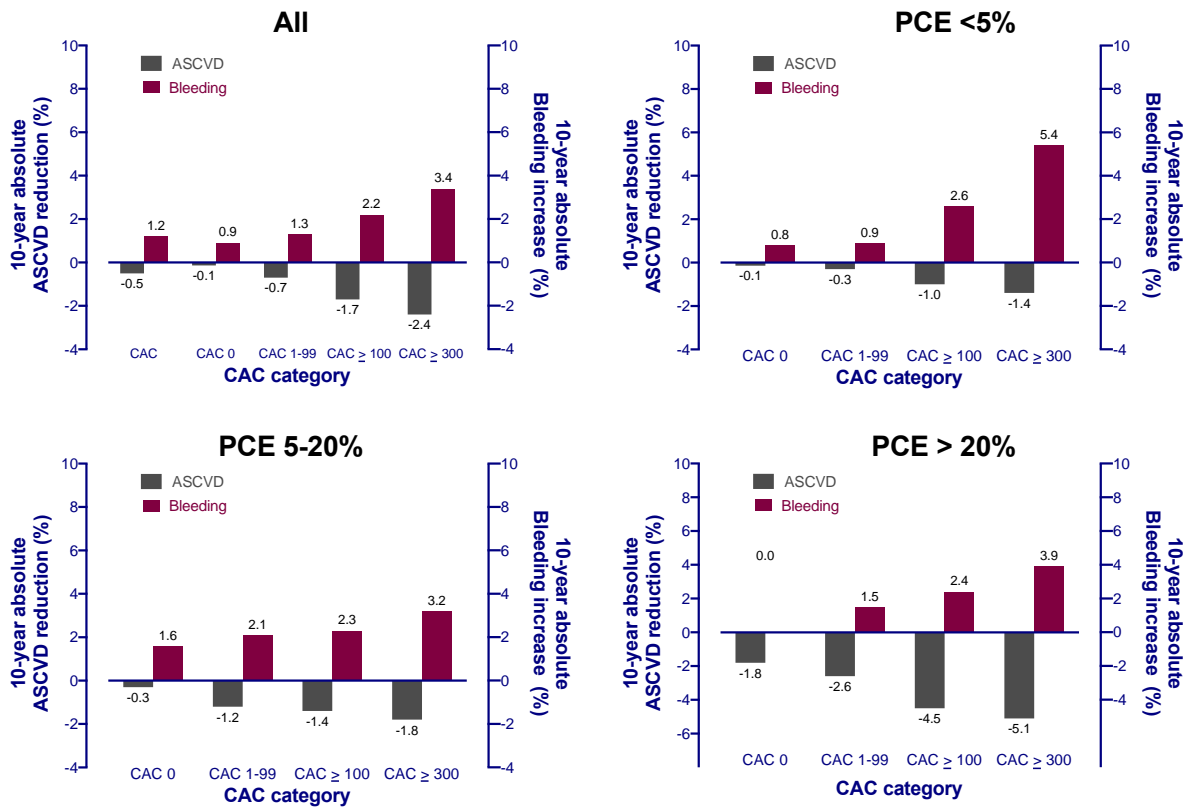

Estimates were generated by applying an 11% relative risk reduction to 10-year ASCVD event rates and a 43% relative risk increase to 10-year bleeding event rates.

Abbreviations: PCE, pooled cohort equation

**eFigure 3.** Estimated increase in bleeding event rate vs reduction in ASCVD event rate with aspirin use for primary prevention in DHS participants without interval aspirin uptake<sup>a</sup>

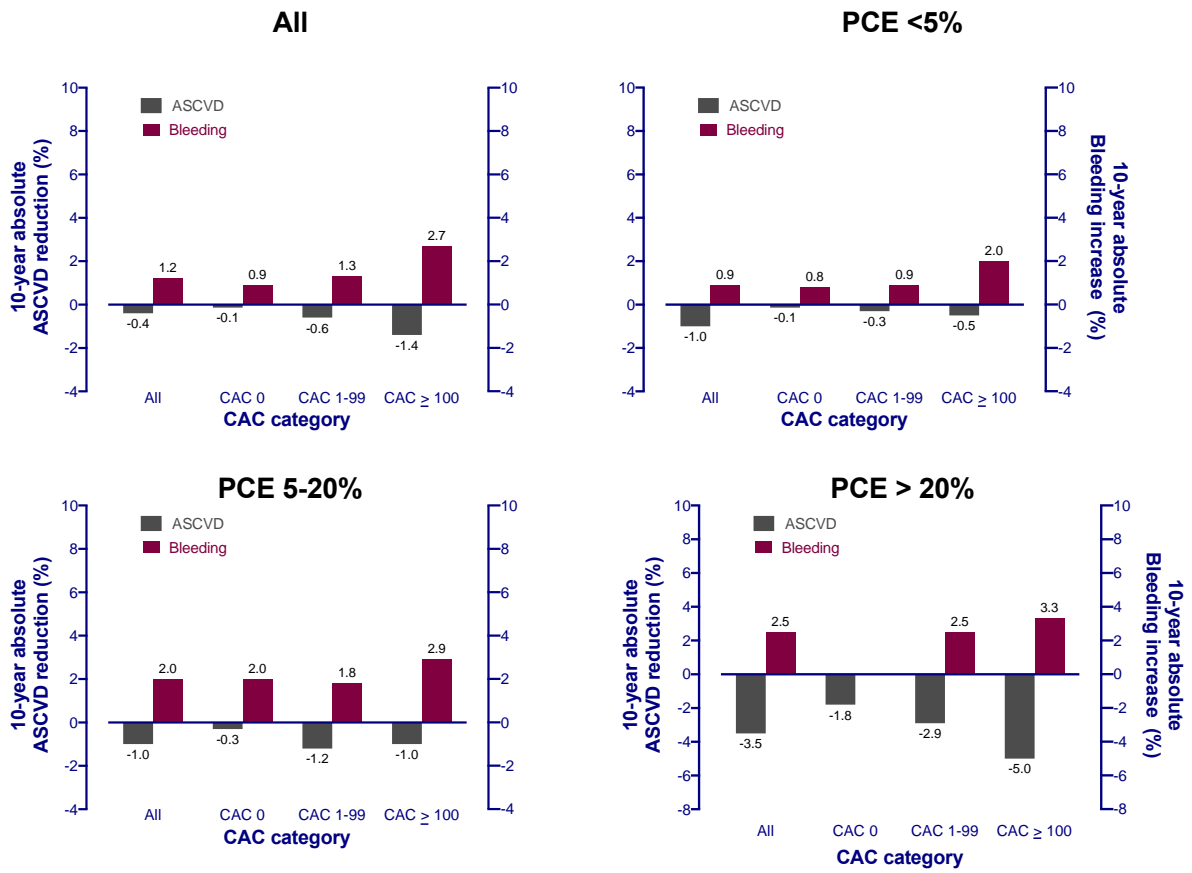

Estimates were generated by applying an 11% relative risk reduction to 10-year ASCVD event rates and a 43% relative risk increase to 10-year bleeding event rates, N=1912.

<sup>a</sup> Participants were confirmed not to be on aspirin at the baseline DHS-2 visit seven years after the baseline DHS-1 visit. Abbreviations: PCE, pooled cohort equation

**eFigure 4.** Estimated increase in 5-year bleeding event rate vs reduction in adjudicated 5-year ASCVD event rate with aspirin use for primary prevention stratified by CAC

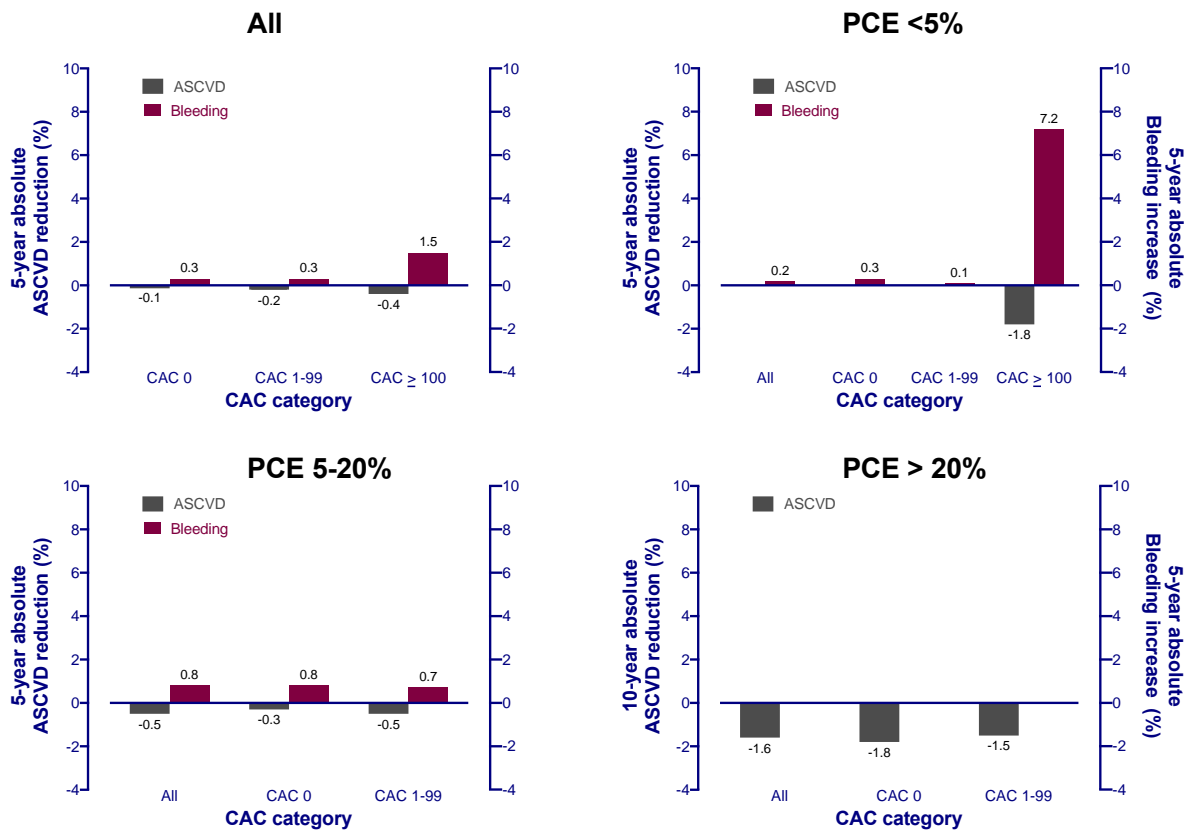

Estimates were generated by applying an 11% relative risk reduction to 5-year ASCVD event rates and a 43% relative risk increase to 5-year bleeding event rates

**eFigure 5.** Estimated increase in bleeding event rate vs reduction in ASCVD event rate with aspirin use for primary prevention in DHS participants stratified by ASCVD risk and CAC (*aspirin effect estimates taken from contemporary aspirin trials*)\*

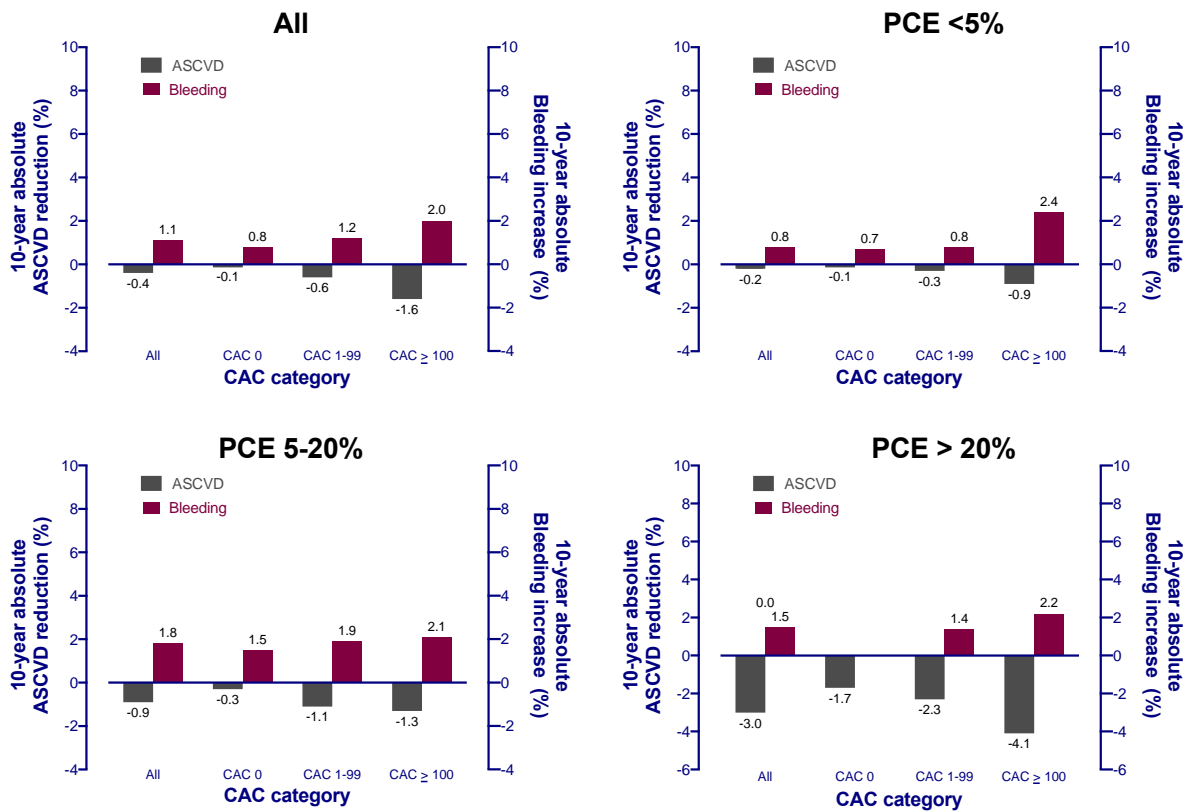

\*Estimates were generated by applying post-hoc effect estimates from a meta-analysis of aspirin trials conducted after 2000 - 10% relative risk reduction to 10-year ASCVD event rates and a 39% relative risk increase to 10-year bleeding event rates.

**eFigure 6.** Estimated increase in bleeding event rate vs reduction in ASCVD event rate with aspirin use for primary prevention in DHS participants at lower bleeding risk stratified by ASCVD risk and CAC (*aspirin effect estimates taken from contemporary aspirin trials*)\*

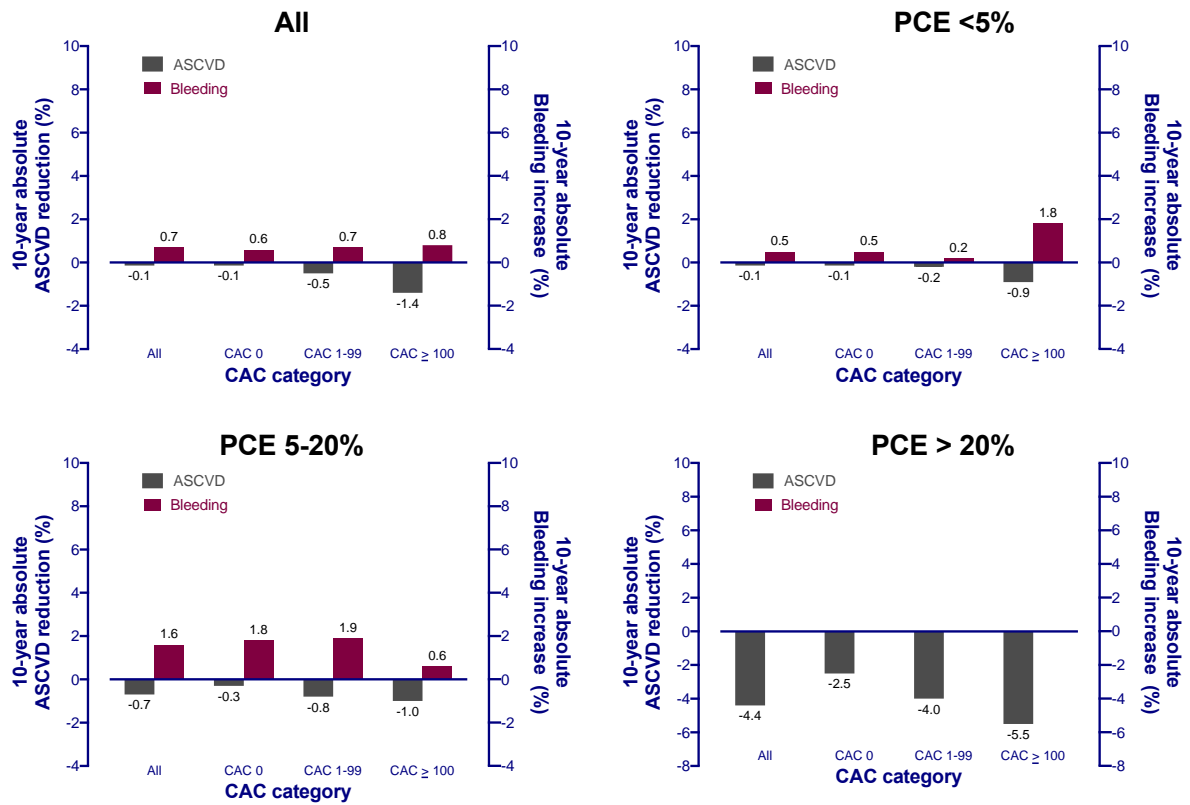

\*Estimates were generated by applying post-hoc effect estimates from a meta-analysis of aspirin trials conducted after 2000 - 10% relative risk reduction to 10-year ASCVD event rates and a 39% relative risk increase to 10-year bleeding event rates.

**eFigure 7.** Estimated increase in bleeding event rate vs reduction in ASCVD event rate with aspirin use for primary prevention in DHS participants stratified by age, ASCVD risk and CAC

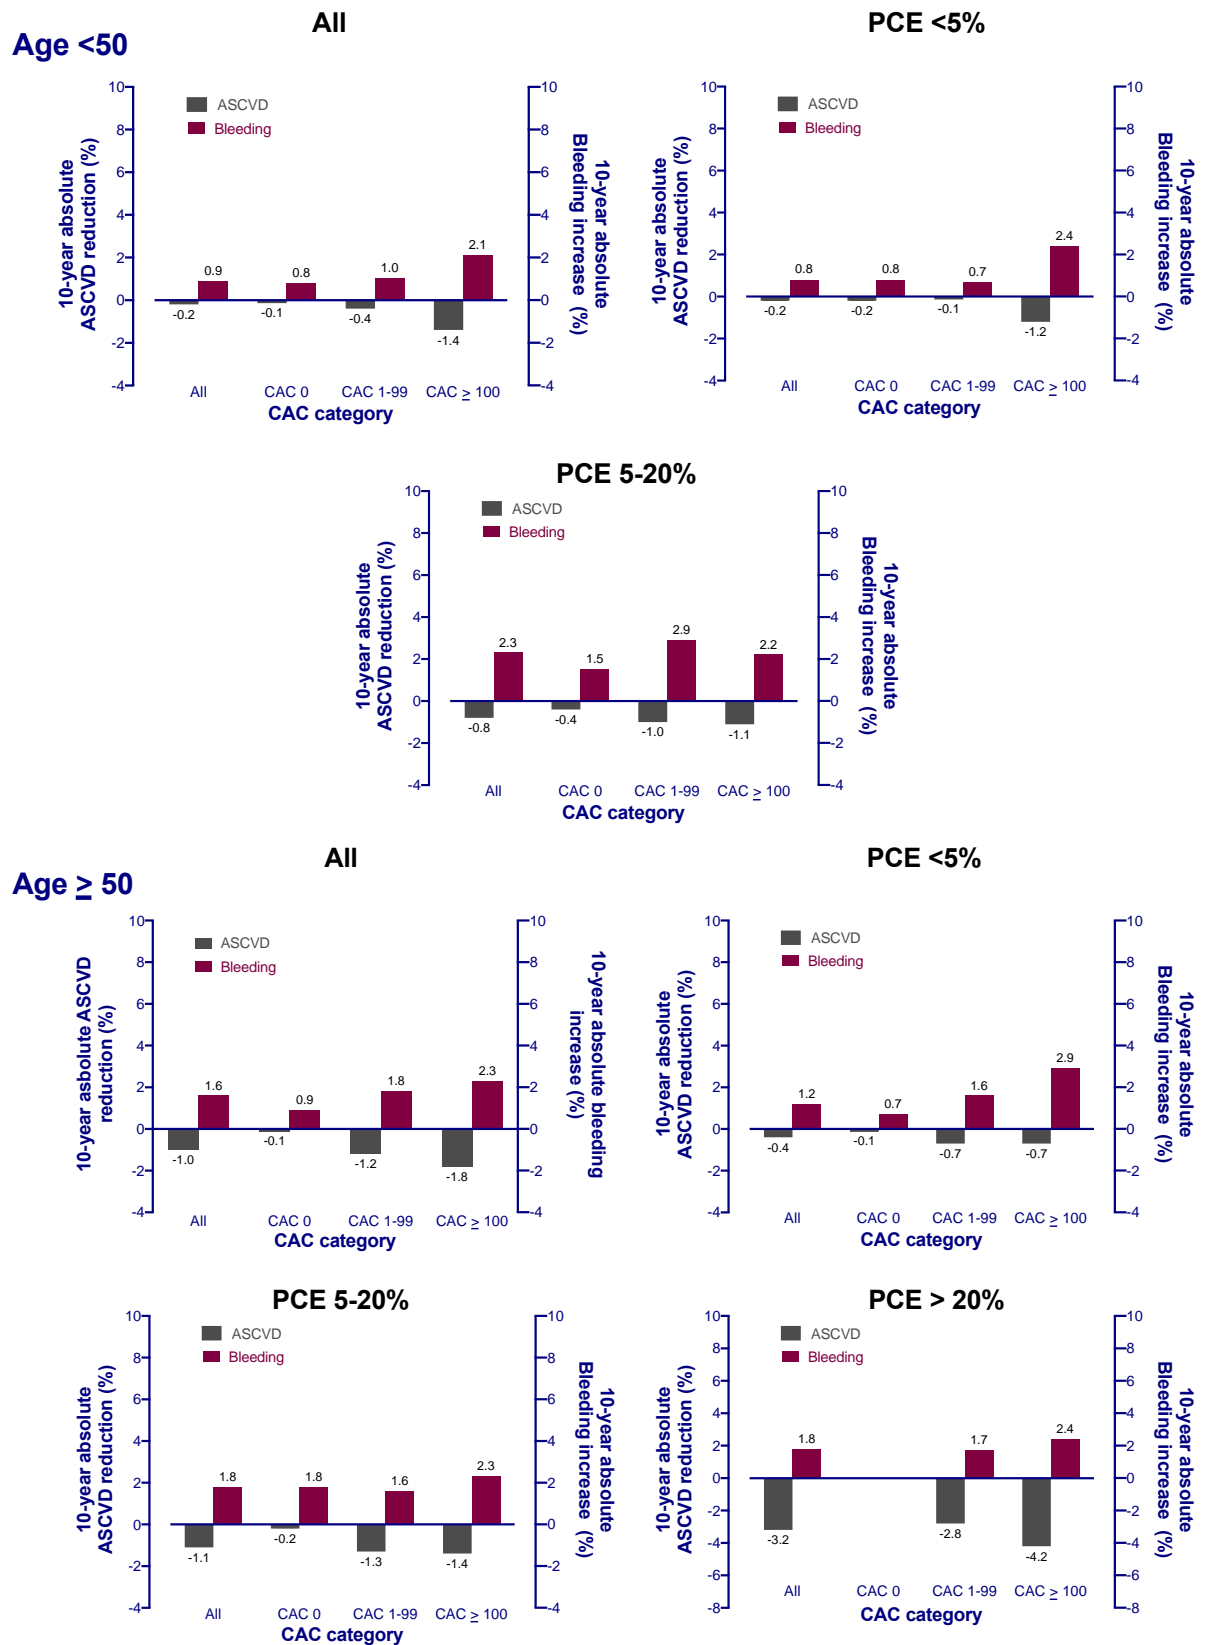

Estimates were generated by applying an 11% relative risk reduction to 10-year ASCVD event rates and a 43% relative risk increase to 10-year bleeding event rates. The number of individuals in each subgroup were as follows: Age <50 - All (N= 1547),



PCE <5% (N=1304), PCE 5-20% (N=189), PCE > 20% (N=5); Age  $\geq$  50 - All (N=647), PCE <5% (N=243), PCE 5-20% (N=319), PCE  $\geq$  20% (N=56). There were too few events to construct a figure for the Age <50, PCE  $\geq$  20% subgroup.  
Abbreviations: PCE, pooled cohort equation

**eTable 1.** ICD codes used to identify bleeding events from the DFWHC and NDI databases

|                                                                                     | ICD-9                                                                                                                                                                                                                                                                                                                                                                                                                                                  | ICD-10                                                                                                                                                                                                                 |
|-------------------------------------------------------------------------------------|--------------------------------------------------------------------------------------------------------------------------------------------------------------------------------------------------------------------------------------------------------------------------------------------------------------------------------------------------------------------------------------------------------------------------------------------------------|------------------------------------------------------------------------------------------------------------------------------------------------------------------------------------------------------------------------|
| <b>Gastrointestinal</b>                                                             |                                                                                                                                                                                                                                                                                                                                                                                                                                                        |                                                                                                                                                                                                                        |
| Peptic ulcer with bleeding and/or perforation                                       | Gastric: 531.0, 531.01, 531.10, 531.11, 531.20, 531.21, 531.50, 531.51, 531.60, 531.61, 531.40, 531.41<br>Duodenal: 532.0, 532.01, 532.10, 532.11, 532.20, 532.21, 532.50, 532.51, 532.60, 532.61, 532.40, 532.41<br>Gastrojejunal: 534.0, 534.01, 534.10, 534.11, 534.20, 534.21, 534.40, 534.41, 534.50, 534.51, 534.60, 534.61<br>Unspecified site: 533.00, 533.01, 533.10, 533.11, 533.20, 533.21, 533.40, 533.41, 533.50, 533.51, 533.60, 533.661 | Gastric: K25.0, K25.1, K25.2, K25.4, K25.5, K25.6<br>Duodenal: K26.0, K26.1, K26.2, K26.4, K26.5, K26.6<br>Gastrojejunal: K28.0, K28.1, K28.2, K28.4, K28.5, K28.6<br>Peptic: K27.0, K27.1, K27.2, K27.4, K27.5, K27.6 |
| Diverticulitis with bleeding or diverticulosis with bleeding                        | 562.02, 562.03, 562.12, 562.13                                                                                                                                                                                                                                                                                                                                                                                                                         | K57.01, K57.13, K57.11, K57.21, K57.31, K57.33, K57.41, K57.51, K57.53, K57.81, K57.91, K57.93                                                                                                                         |
| Angiodysplasia with bleeding                                                        | 537.83, 569.85                                                                                                                                                                                                                                                                                                                                                                                                                                         | K31.82, K55.22                                                                                                                                                                                                         |
| Mallory-Weiss tear                                                                  | 530.7                                                                                                                                                                                                                                                                                                                                                                                                                                                  | K22.6                                                                                                                                                                                                                  |
| Gastritis with bleeding, gastroduodenitis with bleeding or duodenitis with bleeding | 535.01, 535.11, 535.31, 535.41, 535.51, 535.61                                                                                                                                                                                                                                                                                                                                                                                                         | K29.0, K29.21, K29.31, K29.41, K29.51, K29.61, K29.81, K29.71, K29.91                                                                                                                                                  |
| Hemorrhage of anus and rectum                                                       | 569.3                                                                                                                                                                                                                                                                                                                                                                                                                                                  | K62.5                                                                                                                                                                                                                  |
| Hematemesis                                                                         | 578                                                                                                                                                                                                                                                                                                                                                                                                                                                    | K92.0                                                                                                                                                                                                                  |
| Malena                                                                              | 578.1                                                                                                                                                                                                                                                                                                                                                                                                                                                  | K92.1                                                                                                                                                                                                                  |
| Gastrointestinal hemorrhage, unspecified                                            | 578.9                                                                                                                                                                                                                                                                                                                                                                                                                                                  | K92.2                                                                                                                                                                                                                  |
| Esophageal varices with bleeding                                                    | 456.0, 456.20                                                                                                                                                                                                                                                                                                                                                                                                                                          | I85.01, I85.11                                                                                                                                                                                                         |
| Esophageal hemorrhage                                                               | 530.82                                                                                                                                                                                                                                                                                                                                                                                                                                                 |                                                                                                                                                                                                                        |
| <b>Intracranial Bleeding</b>                                                        |                                                                                                                                                                                                                                                                                                                                                                                                                                                        |                                                                                                                                                                                                                        |
| Subarachnoid hemorrhage                                                             | I60                                                                                                                                                                                                                                                                                                                                                                                                                                                    | 430                                                                                                                                                                                                                    |
| Intracerebral hemorrhage                                                            | I61                                                                                                                                                                                                                                                                                                                                                                                                                                                    | 431                                                                                                                                                                                                                    |
| Other nontraumatic intracranial hemorrhage                                          | I62                                                                                                                                                                                                                                                                                                                                                                                                                                                    | 432.0, 432.1, 432.9                                                                                                                                                                                                    |
| Sequelae of subarachnoid hemorrhage                                                 | I69.0                                                                                                                                                                                                                                                                                                                                                                                                                                                  |                                                                                                                                                                                                                        |
| Sequelae of intracerebral hemorrhage                                                | I69.1                                                                                                                                                                                                                                                                                                                                                                                                                                                  |                                                                                                                                                                                                                        |
| Sequelae of other intracranial hemorrhage                                           | I69.2                                                                                                                                                                                                                                                                                                                                                                                                                                                  |                                                                                                                                                                                                                        |
| <b>Other Bleeding</b>                                                               |                                                                                                                                                                                                                                                                                                                                                                                                                                                        |                                                                                                                                                                                                                        |
| Ocular (vitreous and retinal)                                                       | H35.6, H43.1                                                                                                                                                                                                                                                                                                                                                                                                                                           | 362.81, 379.23                                                                                                                                                                                                         |
| Respiratory passage (including epistaxis and hemoptysis)                            | R04                                                                                                                                                                                                                                                                                                                                                                                                                                                    | 784.7, 784.8, 786.3                                                                                                                                                                                                    |
| Hemopericardium/hemoperitoneum                                                      | I31.2, K66.1                                                                                                                                                                                                                                                                                                                                                                                                                                           | 423.0, 568.81                                                                                                                                                                                                          |
| Hemarthrosis                                                                        | M25.0                                                                                                                                                                                                                                                                                                                                                                                                                                                  | 719.10, 719.11, 719.12, 719.13, 719.14, 719.15, 719.16, 719.17, 719.18, 719.19                                                                                                                                         |

**eTable 2.** Bleeding event categories

| <b>Bleeding Type</b> | <b>Non-fatal</b> | <b>Fatal</b> | <b>Total</b> |
|----------------------|------------------|--------------|--------------|
| All                  | 92               | 24           | 116          |
| Gastrointestinal     | 68               | 13           | 81           |
| Intracerebral        | 12               | 6            | 18           |
| Other                | 12               | 5            | 17           |

**eTable 3.** ASCVD event rate and hazard ratios stratified by CAC

| CAC   | N    | ASCVD,<br>n | ASCVD<br>event rate,<br>1000 person-<br>years (95%<br>CI) | Unadjusted<br>ASCVD<br>HR (95%<br>CI) | p Value | Adjusted<br>ASCVD<br>HR (95%<br>CI) <sup>a</sup> | p Value |
|-------|------|-------------|-----------------------------------------------------------|---------------------------------------|---------|--------------------------------------------------|---------|
| All   | 2191 | 123         | 5.1<br>(5.1-5.1)                                          | -                                     | -       | -                                                | -       |
| 0     | 1063 | 17          | 1.3<br>(1.3-1.3)                                          | 1                                     | -       | 1                                                | -       |
| 1-99  | 967  | 72          | 6.27<br>(6.2-6.3)                                         | 4.8<br>(2.8-8.2)                      | <0.01   | 2.5<br>(1.4-4.3)                                 | <0.01   |
| ≥ 100 | 161  | 34          | 19.3<br>(19.1-19.5)                                       | 5.3<br>(3.6-7.9)                      | <0.01   | 2.0<br>(1.3-3.0)                                 | <0.01   |

<sup>a</sup>Model adjusted for age, sex, Race/Ethnicity, diabetes mellitus, current smoking, total cholesterol, HDL cholesterol, anti-hypertensive use, systolic blood pressure, statin use

**eTable 4.** Bleeding event rate and hazard ratios stratified by CAC in DHS participants without interval aspirin uptake<sup>a</sup>

| <b>CAC</b> | <b>N</b> | <b>Bleeding events, n</b> | <b>Bleeding event rate, 1000 person-years (95% CI)</b> | <b>Unadjusted Bleeding HR (95% CI)</b> | <b>p Value</b> | <b>Adjusted Bleeding HR (95% CI)<sup>b</sup></b> | <b>p Value</b> |
|------------|----------|---------------------------|--------------------------------------------------------|----------------------------------------|----------------|--------------------------------------------------|----------------|
| All        | 1912     | 93                        | 1.9<br>(1.9-1.9)                                       | -                                      | -              | =                                                |                |
| 0          | 963      | 31                        | 1.9<br>(1.9-2.0)                                       | 1                                      | -              | 1                                                | -              |
| 1-99       | 832      | 50                        | 3.7<br>(3.7-3.8)                                       | 1.9<br>(1.2-3.0)                       | <0.01          | 1.0<br>(0.6-1.7)                                 | 0.95           |
| ≥ 100      | 117      | 12                        | 7.8<br>(7.7-7.9)                                       | 2.7<br>(1.5-5.0)                       | <0.01          | 1.3<br>(0.7-2.6)                                 | 0.39           |

<sup>a</sup>The subgroup of participants not on aspirin at the baseline DHS-2 visit seven years after the baseline DHS-1 visit.

<sup>b</sup>Model adjusted for age, sex, race/Ethnicity, SBP, anti-hypertensive use, smoking status, diabetes mellitus, PUD, PPI/Antacid, corticosteroid.

|                                   | ALL  |      |      |      | PCE <5% |     |      |      | PCE 5-20% |     |      |      | PCE ≥ 20% |      |      |      |
|-----------------------------------|------|------|------|------|---------|-----|------|------|-----------|-----|------|------|-----------|------|------|------|
| CAC                               | All  | 0    | 1-99 | ≥100 | All     | 0   | 1-99 | ≥100 | All       | 0   | 1-99 | ≥100 | All       | 0    | 1-99 | ≥100 |
| <i>All</i>                        |      |      |      |      |         |     |      |      |           |     |      |      |           |      |      |      |
| Participants, N                   | 2191 | 1063 | 967  | 161  | 1547    | 908 | 606  | 33   | 508       | 108 | 303  | 97   | 61        | 6    | 30   | 25   |
| ASCVD events, n                   | 94   | 11   | 58   | 25   | 27      | 7   | 17   | 3    | 47        | 3   | 32   | 12   | 18        | 1    | 7    | 10   |
| 10Y ASCVD event rate (%)          | 4.3  | 1.0  | 6.0  | 15.7 | 1.8     | 0.8 | 2.8  | 9.1  | 9.3       | 2.8 | 10.6 | 12.5 | 29.7      | 16.8 | 23.3 | 41.1 |
| Bleeding events, n                | 65   | 23   | 34   | 8    | 35      | 19  | 14   | 2    | 25        | 4   | 16   | 5    | 2         | 0    | 1    | 1    |
| 10Y bleeding event rate (%)       | 2.7  | 2.0  | 3.1  | 5.2  | 2.0     | 1.9 | 2.0  | 6.1  | 4.7       | 3.8 | 4.8  | 5.3  | 3.8       | 0    | 3.6  | 5.6  |
| <i>No interval aspirin uptake</i> |      |      |      |      |         |     |      |      |           |     |      |      |           |      |      |      |
| Participants, N                   | 1912 | 963  | 832  | 117  | 1397    | 833 | 542  | 22   | 415       | 89  | 250  | 76   | 41        | 6    | 19   | 16   |
| ASCVD events, n                   | 70   | 7    | 48   | 15   | 20      | 4   | 15   | 1    | 36        | 2   | 27   | 7    | 13        | 1    | 5    | 7    |
| 10Y ASCVD event rate (%)          | 3.7  | 0.7  | 5.8  | 13.0 | 1.5     | 0.5 | 2.8  | 4.6  | 8.7       | 2.3 | 10.9 | 9.3  | 32.0      | 16.7 | 26.3 | 45.0 |
| Bleeding events, n                | 59   | 22   | 30   | 7    | 33      | 18  | 14   | 1    | 21        | 4   | 12   | 5    | 2         | 0    | 1    | 1    |
| 10Y bleeding event rate (%)       | 2.8  | 2.1  | 3.1  | 6.3  | 2.1     | 1.9 | 2.2  | 4.6  | 4.7       | 4.6 | 4.1  | 6.8  | 5.7       | 0    | 5.9  | 7.7  |
| <i>Age &lt;50</i>                 |      |      |      |      |         |     |      |      |           |     |      |      |           |      |      |      |
| Participants, N                   | 1547 | 882  | 624  | 41   | 1304    | 789 | 497  | 18   | 189       | 60  | 109  | 20   | 5         | 1    | 3    | 1    |
| ASCVD events, n                   | 34   | 9    | 20   | 5    | 18      | 6   | 10   | 2    | 14        | 2   | 10   | 2    | 2         | 1    | 0    | 1    |
| 10Y ASCVD event rate (%)          | 2.2  | 1.0  | 3.2  | 12.3 | 1.4     | 0.8 | 2.0  | 11.1 | 7.5       | 3.3 | 9.2  | 10.0 | 40        | 100  | 0    | 100  |
| Bleeding events, n                | 38   | 19   | 17   | 2    | 28      | 17  | 10   | 1    | 10        | 2   | 7    | 1    | 0         | 0    | 0    | 0    |
| 10Y bleeding event rate (%)       | 2.2  | 1.9  | 2.4  | 4.9  | 1.9     | 1.9 | 1.6  | 5.6  | 5.4       | 3.4 | 6.7  | 5.0  | 0         | 0    | 0    | 0    |

| <i>Age ≥ 50</i>                    |      |     |      |      |      |     |     |     |      |     |      |      |      |      |      |      |
|------------------------------------|------|-----|------|------|------|-----|-----|-----|------|-----|------|------|------|------|------|------|
| <b>Participants, N</b>             | 644  | 181 | 343  | 120  | 243  | 119 | 109 | 15  | 319  | 48  | 194  | 77   | 56   | 5    | 27   | 24   |
| <b>ASCVD events, n</b>             | 60   | 2   | 38   | 20   | 9    | 1   | 7   | 1   | 33   | 1   | 22   | 10   | 16   | 0    | 7    | 9    |
| <b>10Y ASCVD event rate (%)</b>    | 9.4  | 1.1 | 11.1 | 16.8 | 3.7  | 0.8 | 6.5 | 6.7 | 10.4 | 2.1 | 11.4 | 13.1 | 28.8 | 0    | 25.9 | 38.4 |
| <b>Bleeding events, n</b>          | 27   | 4   | 17   | 6    | 7    | 2   | 4   | 1   | 15   | 2   | 9    | 4    | 2    | 0    | 1    | 1    |
| <b>10Y bleeding event rate (%)</b> | 3.8  | 2.2 | 4.2  | 5.3  | 2.9  | 1.7 | 3.7 | 6.7 | 4.2  | 4.3 | 3.7  | 5.4  | 4.1  | 0    | 4.0  | 5.6  |
| <i>Lower bleeding risk</i>         |      |     |      |      |      |     |     |     |      |     |      |      |      |      |      |      |
| <b>Participants, N</b>             | 1430 | 752 | 579  | 99   | 1050 | 647 | 381 | 22  | 294  | 67  | 164  | 63   | 25   | 4    | 10   | 11   |
| <b>ASCVD events, n</b>             | 48   | 8   | 26   | 14   | 14   | 5   | 7   | 2   | 21   | 2   | 13   | 6    | 11   | 1    | 4    | 6    |
| <b>10Y ASCVD event rate (%)</b>    | 0.5  | 1.1 | 4.5  | 14.3 | 1.35 | 0.7 | 1.9 | 9.1 | 7.2  | 3.0 | 7.9  | 9.5  | 44.0 | 25.0 | 40.0 | 54.6 |
| <b>Bleeding events, n</b>          | 26   | 12  | 12   | 2    | 12   | 9   | 2   | 1   | 12   | 3   | 8    | 1    | 0    | 0    | 0    | 0    |
| <b>10Y bleeding event rate (%)</b> | 1.8  | 1.6 | 1.9  | 2.1  | 1.2  | 1.4 | 0.5 | 4.6 | 4.1  | 4.5 | 4.9  | 1.6  | 0    | 0    | 0    | 0    |
| <i>Higher bleeding risk</i>        |      |     |      |      |      |     |     |     |      |     |      |      |      |      |      |      |
| <b>Participants, N</b>             | 761  | 311 | 388  | 62   | 497  | 261 | 225 | 11  | 214  | 41  | 139  | 34   | 36   | 2    | 20   | 14   |
| <b>ASCVD events, n</b>             | 46   | 3   | 32   | 11   | 13   | 2   | 10  | 1   | 26   | 1   | 19   | 6    | 7    | 0    | 3    | 4    |
| <b>10Y ASCVD event rate (%)</b>    | 6.1  | 1.0 | 8.3  | 17.9 | 2.6  | 0.8 | 4.5 | 9.1 | 12.2 | 2.4 | 13.8 | 17.7 | 19.7 | 0    | 15.0 | 29.9 |
| <b>Bleeding events, n</b>          | 39   | 11  | 22   | 6    | 23   | 10  | 12  | 1   | 13   | 1   | 8    | 4    | 2    | 0    | 1    | 1    |
| <b>10Y bleeding event rate (%)</b> | 4.5  | 2.9 | 4.8  | 10.2 | 3.9  | 3.1 | 4.5 | 9.1 | 5.4  | 2.6 | 4.6  | 12.1 | 6.6  | 0    | 5.6  | 10.0 |

**eTable 5. Observed ASCVD and bleeding events at 10 years in various subgroups**
